# Supplementary material for: Nanobodies and chemical cross-links advance the structural and functional analysis of PI3Kα
Source: PubMed Central journal article supplement (PMC9499577; doi:10.1073/pnas.2210769119), 2022-09-12
Supplement: pnas.2210769119.sapp.pdf [file pnas.2210769119.sapp.pdf]

## **Supplementary Information for**

Nanobodies and chemical cross-links advance the structural and functional analysis of PI3K $\alpha$

Jonathan R. Hart, Xiao Liu, Chen Pan, Anyi Liang, Lynn Ueno, Yingna Xu, Alexandra Quezada, Xinyu Zou, Su Yang, Qingtong Zhou, Steve Schoonooghe, Gholamreza Hassanzadeh-Ghassabeh, Tian Xia, Wenqing Shui, Dehua Yang, Peter K. Vogt, Ming-Wei Wang

Corresponding authors: Wenqing Shui, Dehua Yang, Peter K. Vogt, Ming-Wei Wang  
Email: [shuiwq@shanghaitech.edu.cn](mailto:shuiwq@shanghaitech.edu.cn), [dhyang@simm.ac.cn](mailto:dhyang@simm.ac.cn), [pkvogt@scripps.edu](mailto:pkvogt@scripps.edu), [mwwang@simm.ac.cn](mailto:mwwang@simm.ac.cn)

### **This PDF file includes:**

Figures S1 to S8  
Tables S1 to S4

### **Other supplementary materials for this manuscript include the following:**

Dataset S1 – Excel file

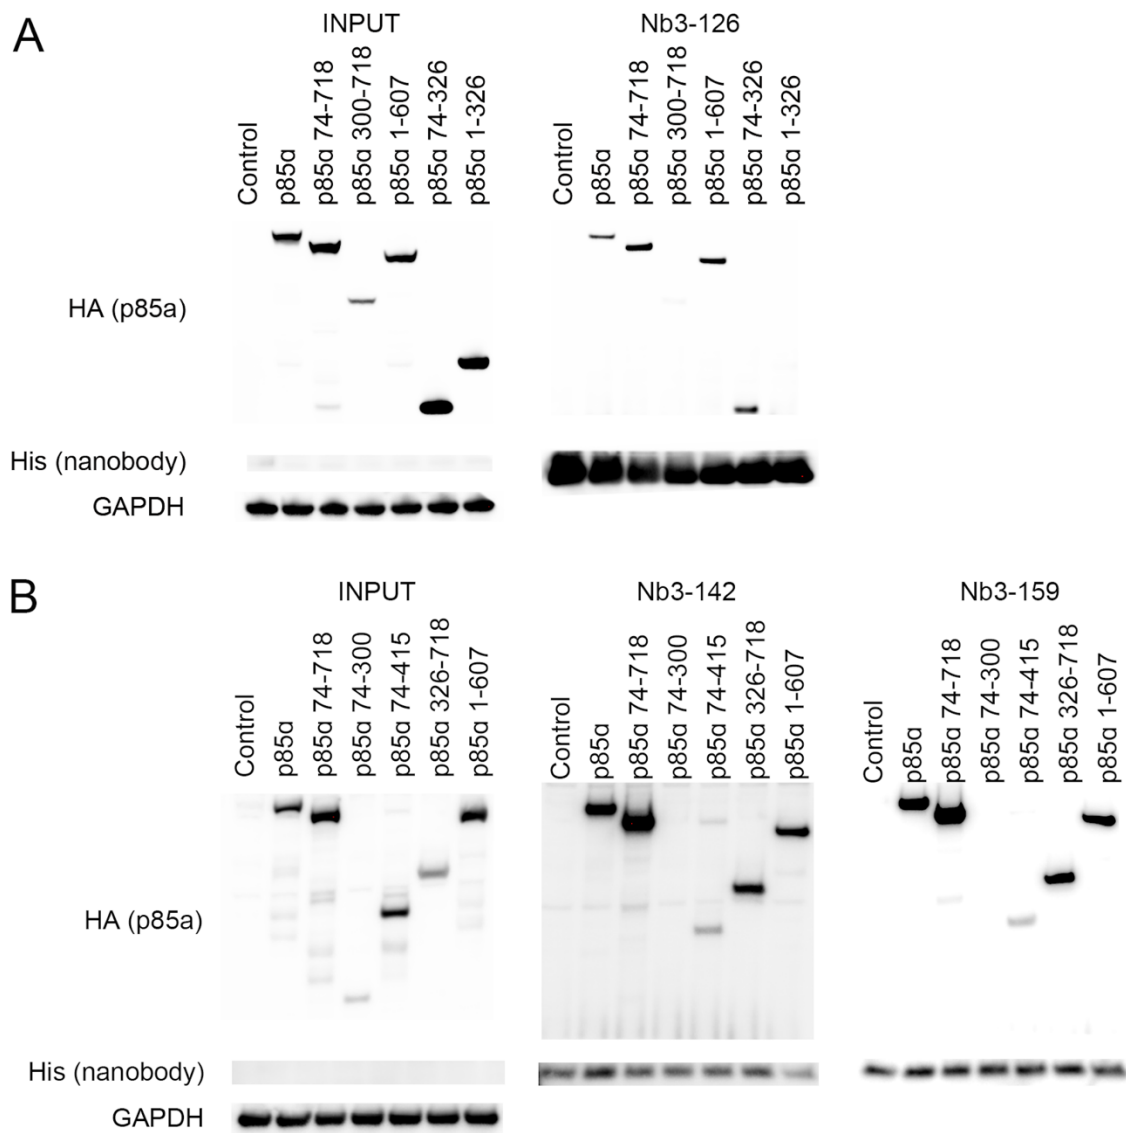

**Fig. S1.** Co-immunoprecipitation of p110 $\alpha$  with indicated N-terminally HA-tagged p85 $\alpha$  truncation constructs. (A) Nb3-126 specifically interacts with p85 $\alpha$  74-326, the BH domain. (B) Nb3-142 and Nb3-159 specifically interact with the nSH2 domain in the 326-415 region.

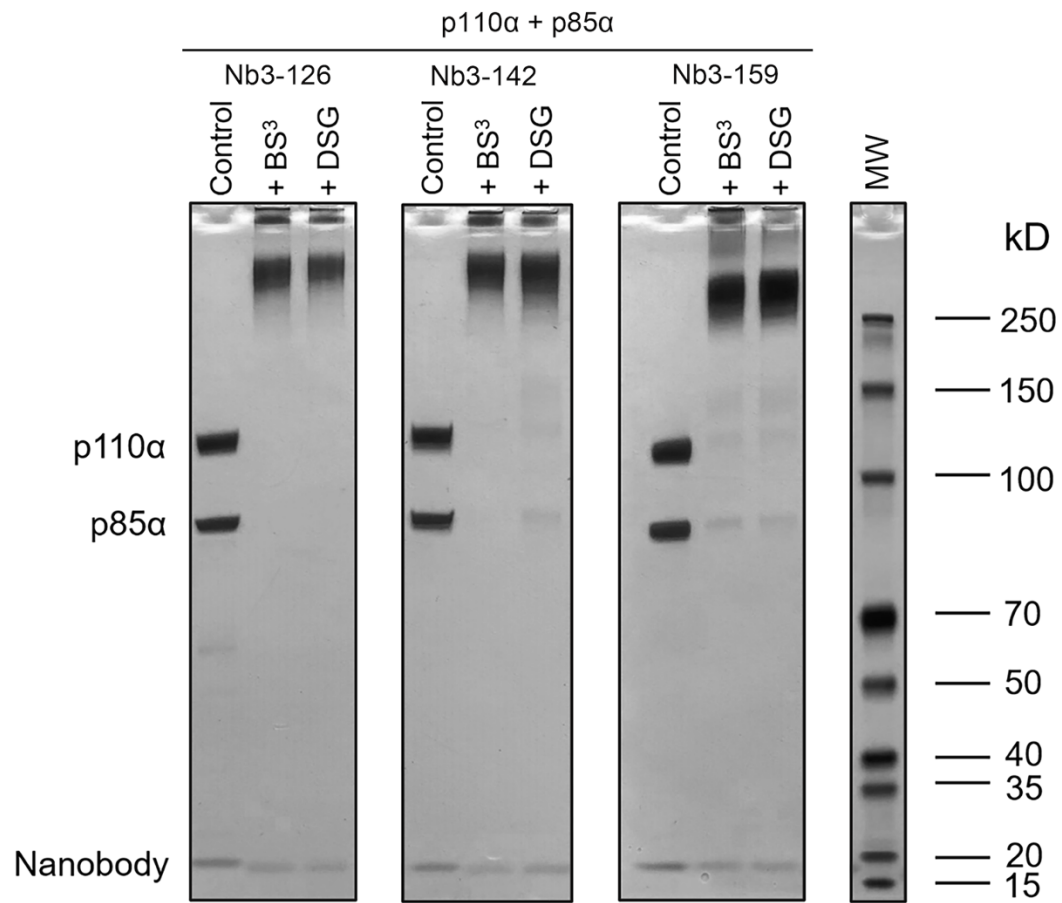

**Fig. S2.** Cross-linking products of PI3K $\alpha$  with Nb3-126, Nb3-142 and Nb3-159 were evaluated using SDS-PAGE.

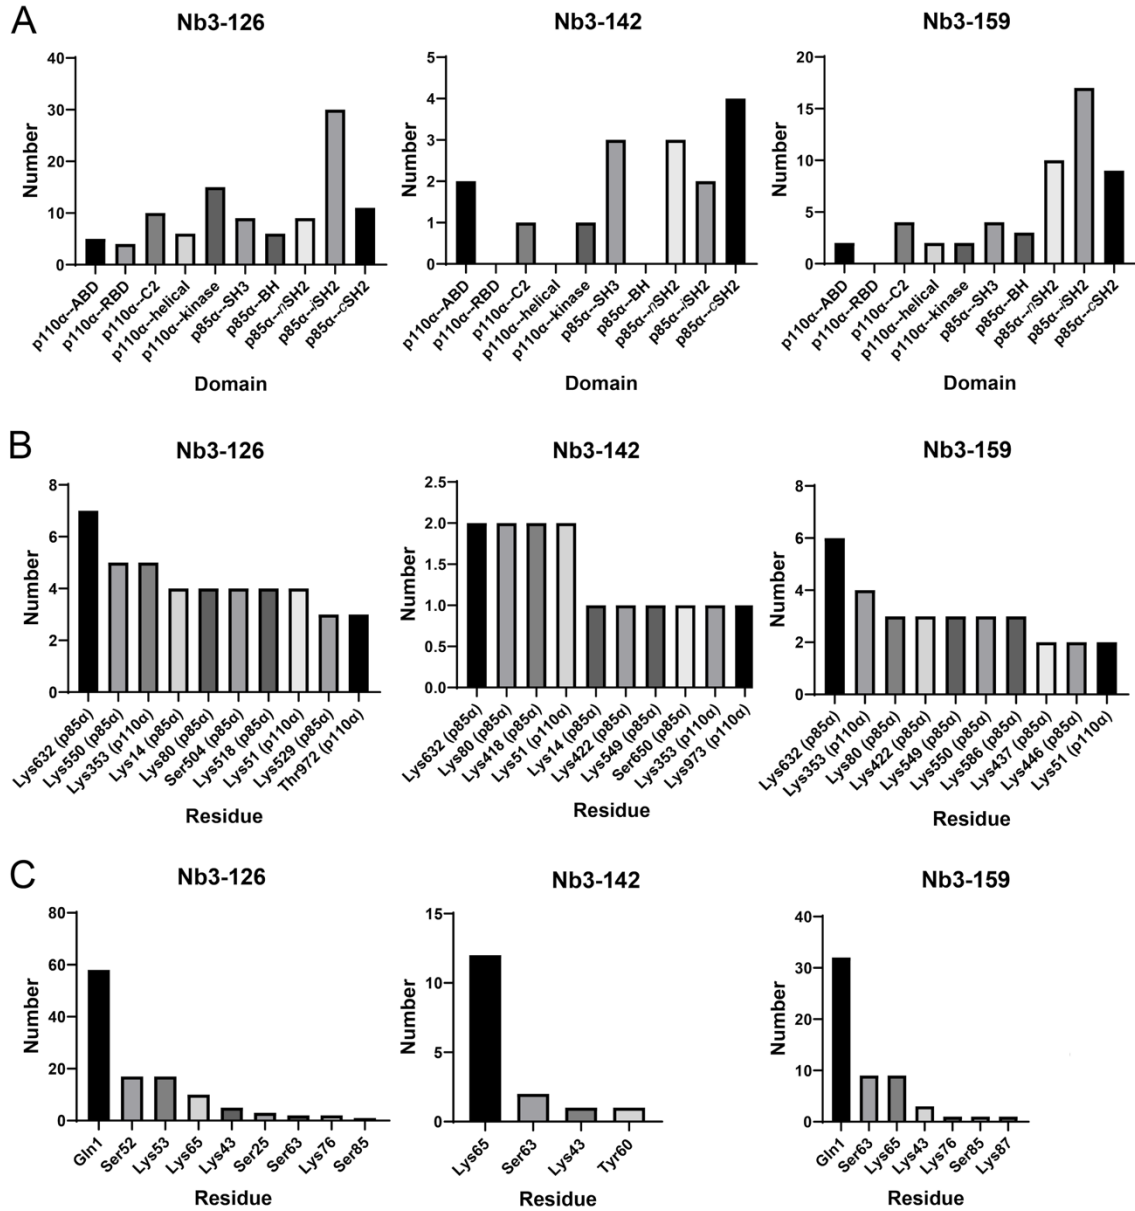

**Fig. S3.** Cross-links assigned between sites of PI3K $\alpha$  and the three nanobodies. (A) The number of identified cross-links between each domain of PI3K $\alpha$  and the nanobodies. (B) The top 10 residues in PI3K $\alpha$  having the largest number of cross-links with the nanobodies. (C) The number of identified cross-links between a specific residue of the nanobody and that of PI3K $\alpha$ .

**A**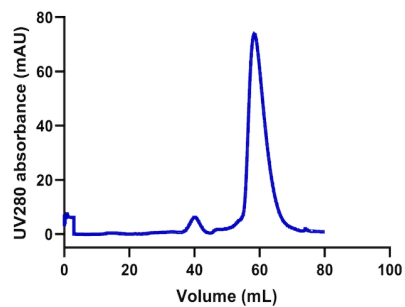**B**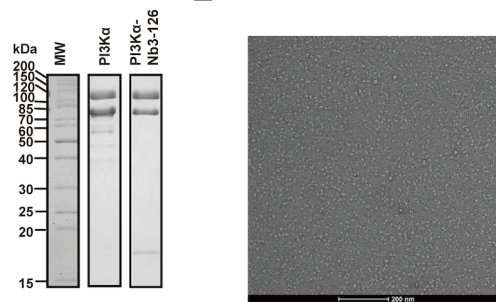**C**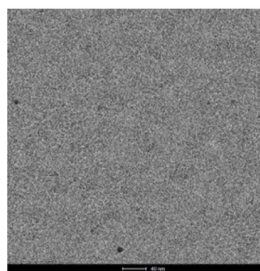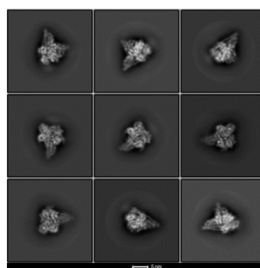**D**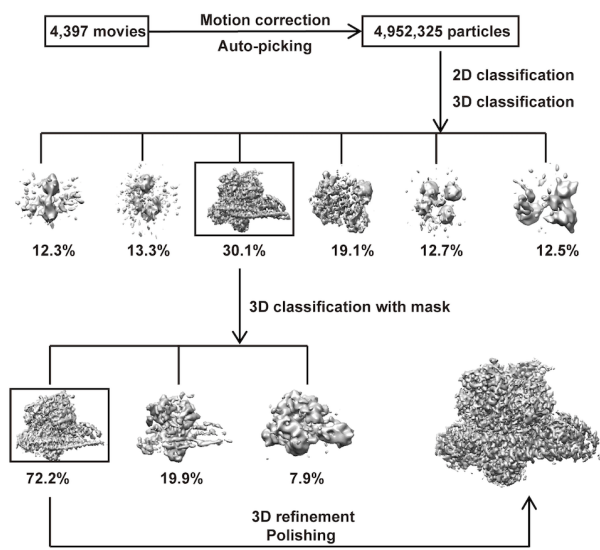**E**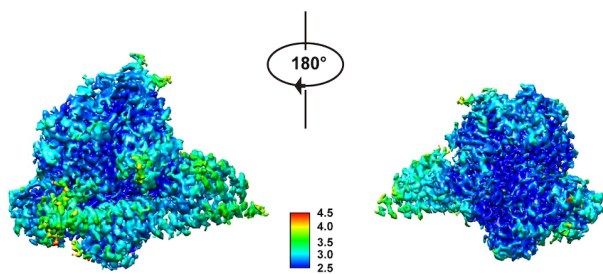**F**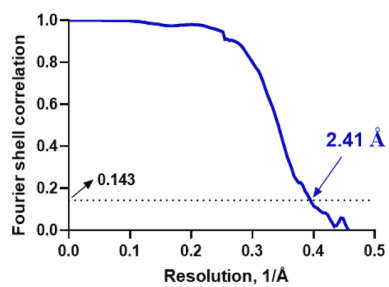

**Fig. S4.** Characterization and cryo-EM analysis of the Nb3-126 complex. (A) Analytical size exclusion chromatography, SDS-PAGE/Coomassie blue stain of the purified Nb3-126 complex. (B) Representative negative staining image of the purified Nb3-126 complex. (C) Representative cryo-EM micrographs of the Nb3-126 complex. Representative 2D class averages showing distinct secondary structure features from different views. (D) Workflow of cryo-EM data processing for the Nb3-126 complex. (E) Cryo-EM maps are colored by local resolution (Å). (F) 'Gold-standard' FSC curves of the Nb3-126 complex, indicating the resolution is 2.41 Å at a FSC of 0.143.

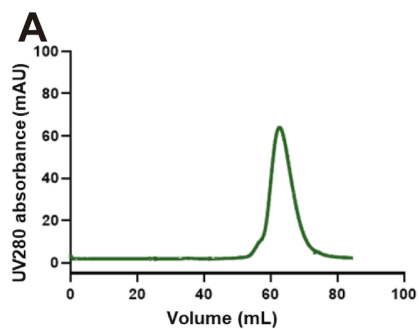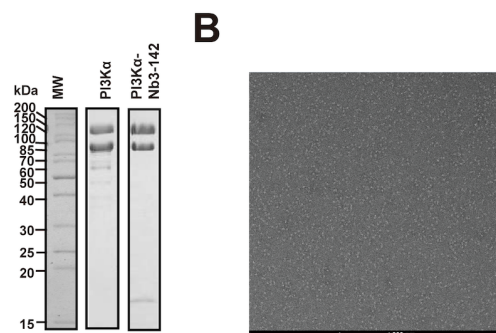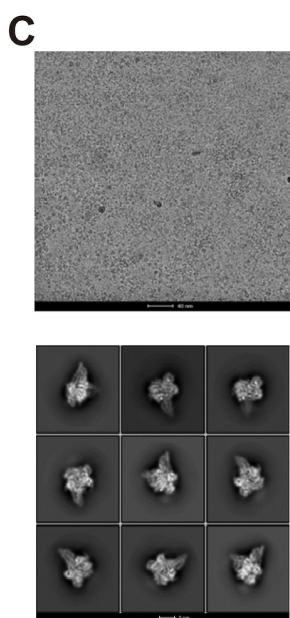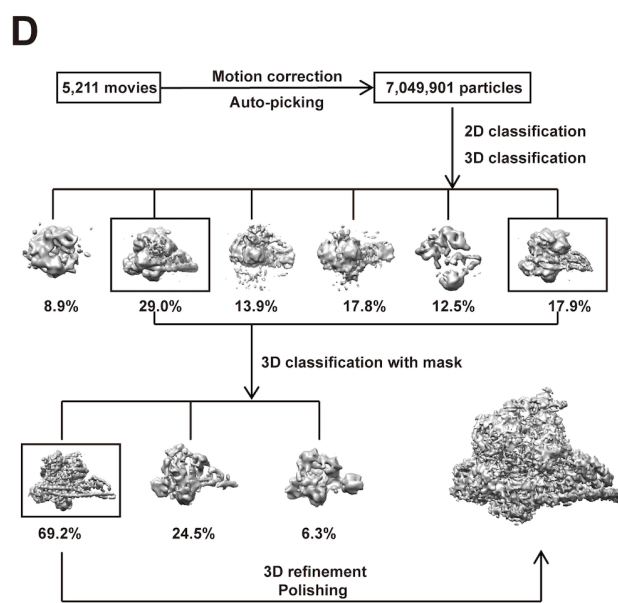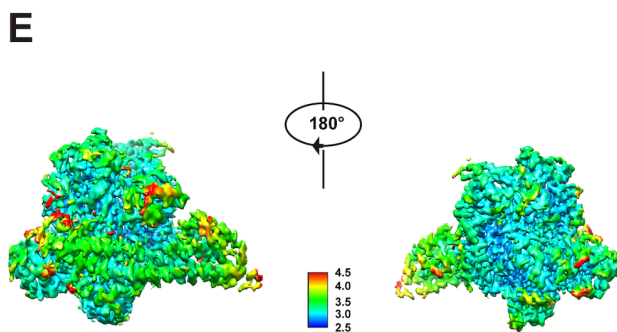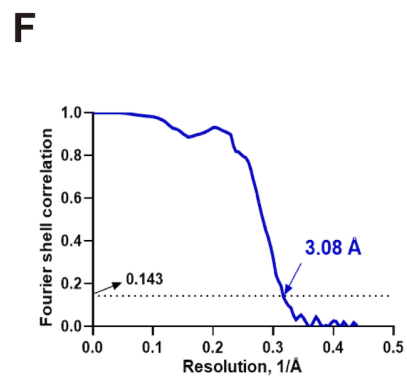

**Fig. S5.** Characterization and cryo-EM analysis of the Nb3-142 complex. (A) Analytical size exclusion chromatography, SDS-PAGE/Coomassie blue stain of the purified Nb3-142 complex. (B) Representative negative staining image of the purified Nb3-142 complex. (C) Representative cryo-EM micrographs of the Nb3-142 complex. Representative 2D class averages showing distinct secondary structure features from different views. (D) Workflow of cryo-EM data processing for the Nb3-142 complex. (E) Cryo-EM maps are colored by local resolution (Å). (F) 'Gold-standard' FSC curves of the Nb3-142 complex, indicating the resolution is 3.08 Å at a FSC of 0.143.



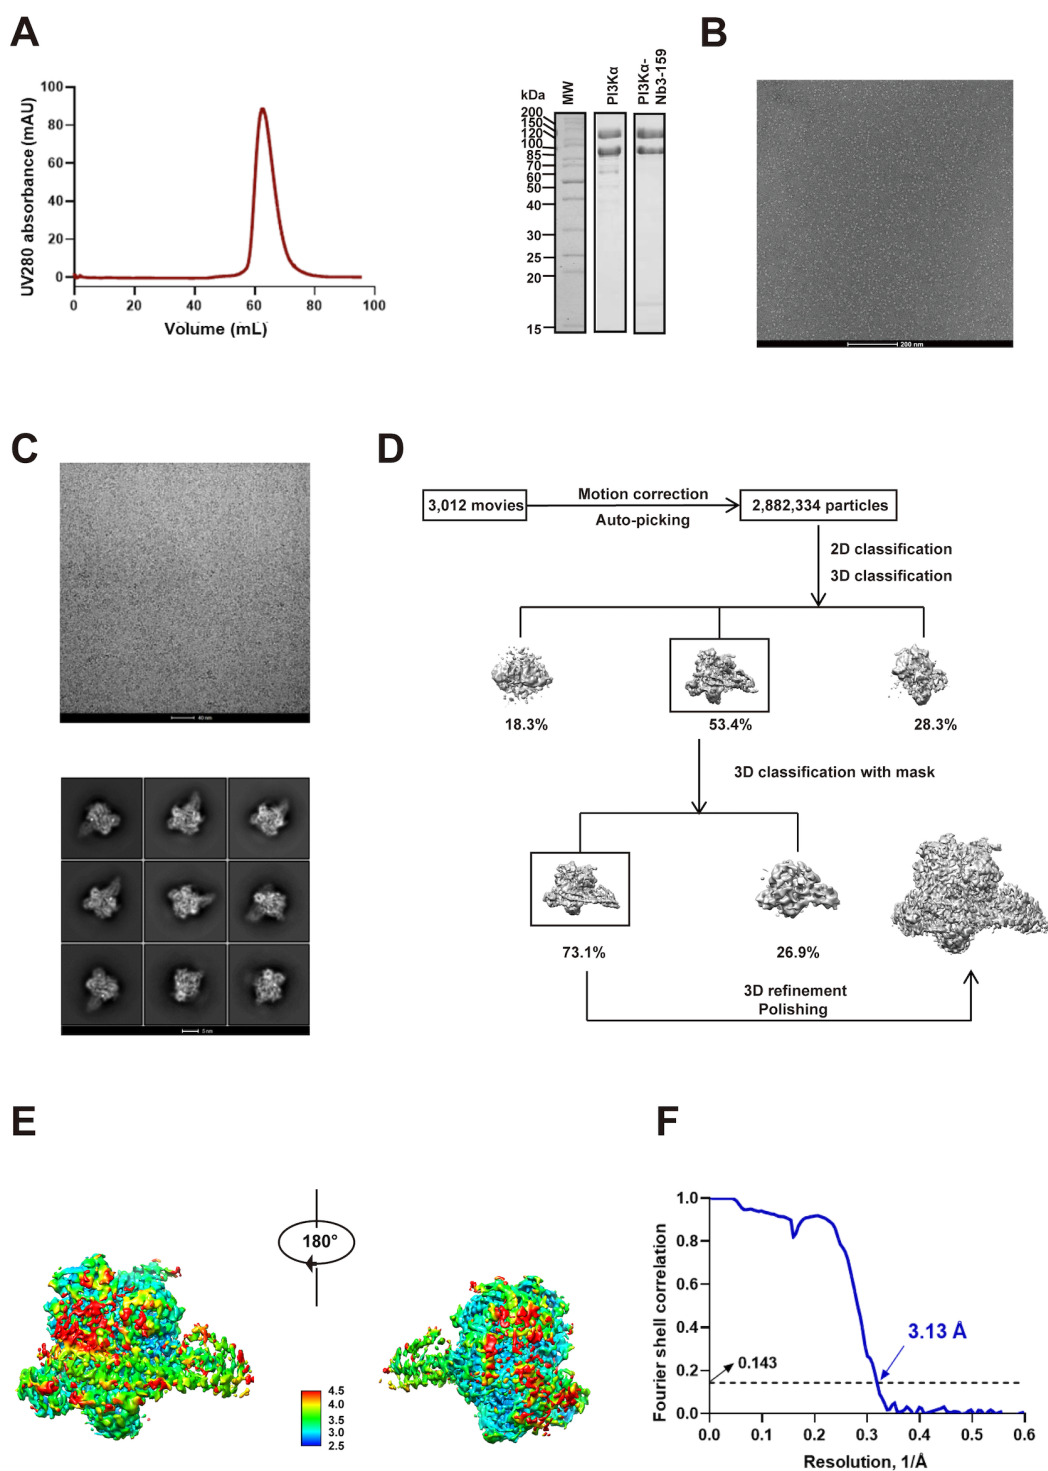

**Fig. S6.** Characterization and cryo-EM analysis of the Nb3-159 complex. (A) Analytical size exclusion chromatography, SDS-PAGE/Coomassie blue stain of the purified Nb3-159 complex. (B)

Representative negative staining image of the purified Nb3-159 complex. (C) Representative cryo-EM micrographs of the Nb3-159 complex. Representative 2D class averages showing distinct secondary structure features from different views. (D) Workflow of cryo-EM data processing for the Nb3-159 complex. (E) Cryo-EM maps are colored by local resolution (Å). (F) 'Gold-standard' FSC curves of the Nb3-159 complex, indicating the resolution is 3.13 Å at a FSC of 0.143.

Nb3-159

Component 2

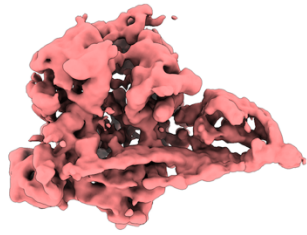

Component 1

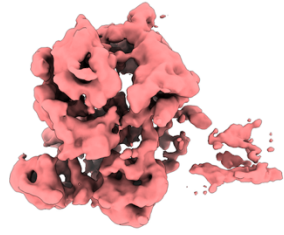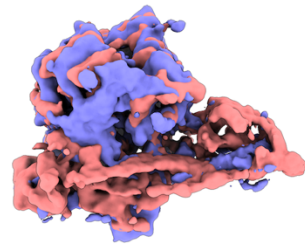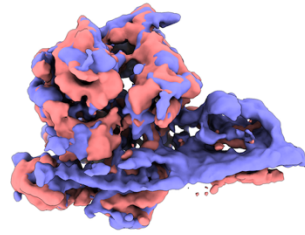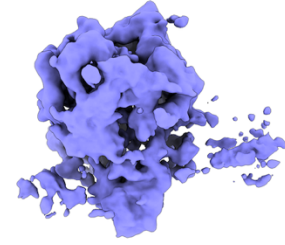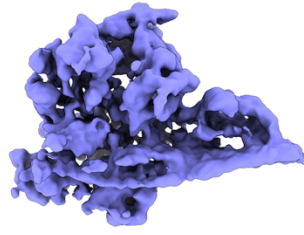

Nb3-142

Component 2

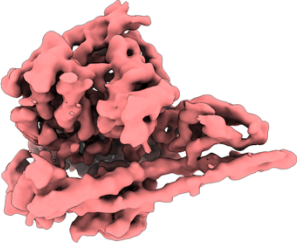

Component 1

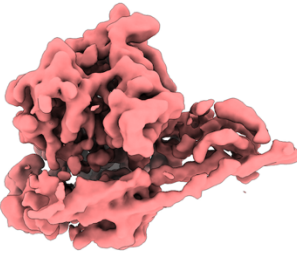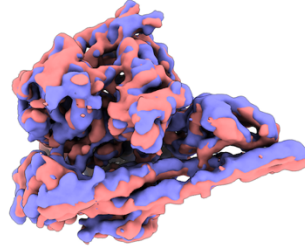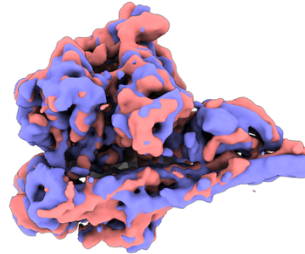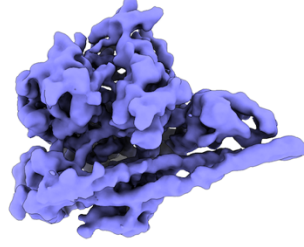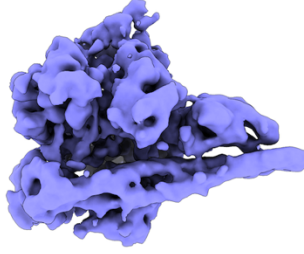

Nb3-126

Component 2

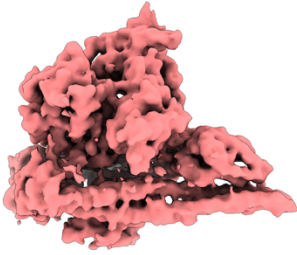

Component 1

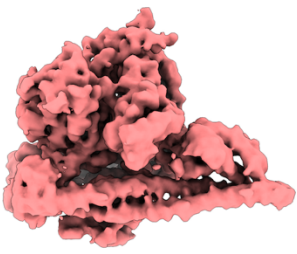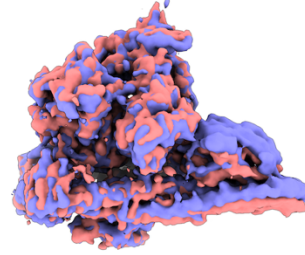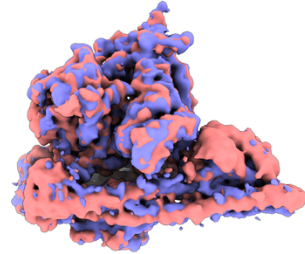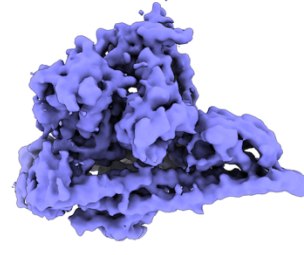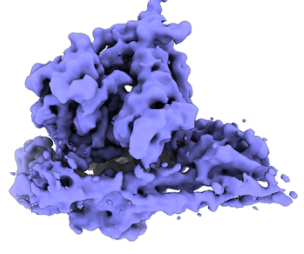

**Fig. S7.** 3D variability analysis of Nb3-126, Nb3-142, and Nb3-159. The indicated complexes are shown as positive (red) and negative (blue) variations with the components displayed. Nb3-126 and Nb3-142 both show two motions of the ABD and iSH2 corresponding to a side-to-side and up-and-down motion of the ABD-iSH2 region. However, Nb3-159 shows a radical deflection of the ABD-iSH2 domain in component 1 positive (red) and near complete disorder of the ABD and iSH2 domains in the component 2 negative (blue). Both of these motions are accompanied by major structural changes in the kinase domain including narrowing of the active site.

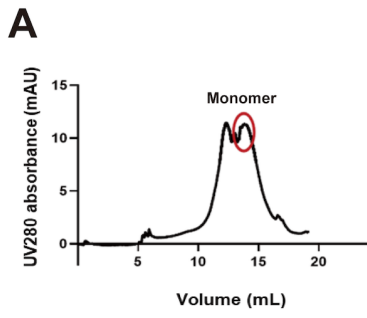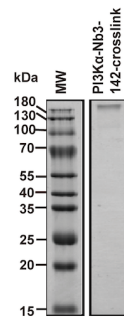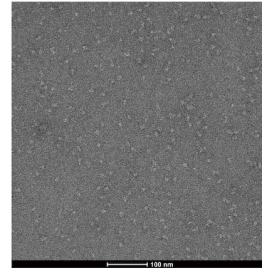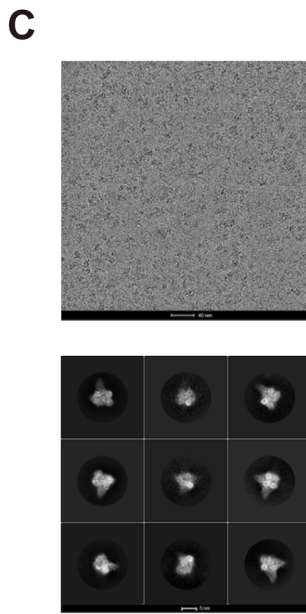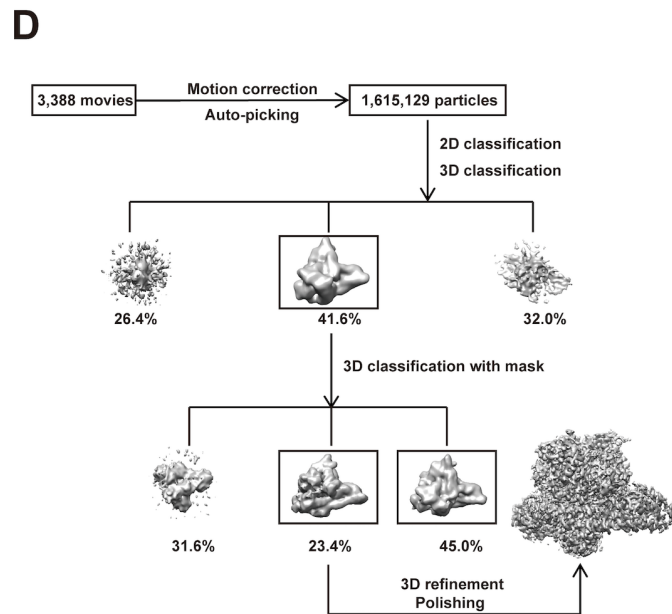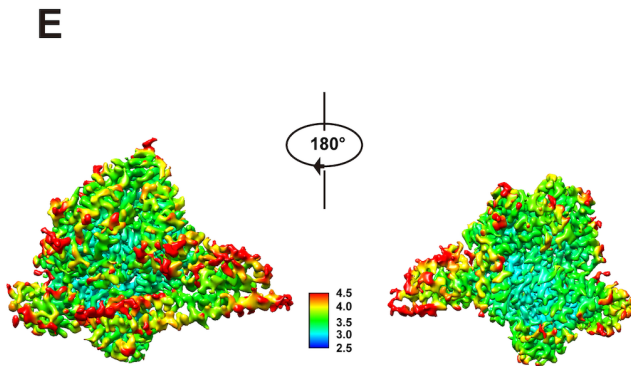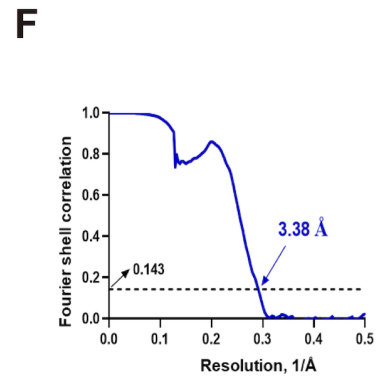

**Fig. S8.** Characterization and cryo-EM analysis of the DSG cross-linked Nb3-142 complex. (A) Analytical size exclusion chromatography, SDS-PAGE/Coomassie blue stain of the purified cross-linked Nb3-142 complex. (B) Representative negative staining image of the purified cross-linked Nb3-142 complex. (C) Representative cryo-EM micrographs of the cross-linked Nb3-142 complex. Representative 2D class averages showing distinct secondary structure features from different views. (D) Workflow of cryo-EM data processing for the cross-linked Nb3-142 complex. (E) Cryo-EM maps are colored by local resolution (Å). (F) 'Gold-standard' FSC curves of the cross-linked Nb3-142 complex, indicating the resolution is 3.38 Å at a FSC of 0.143.

**Table S1.** Inter-protein cross-links identified between PI3K $\alpha$  and Nb3-126.

|           | <b>Nb3-126<br/>Cross-link<br/>pair</b> | <b>Linker</b>            | <b>Peptide sequence</b>                                          | <b>Best E-<br/>value<sup>a</sup></b> | <b>Best<br/>score<sup>b</sup></b> |
|-----------|----------------------------------------|--------------------------|------------------------------------------------------------------|--------------------------------------|-----------------------------------|
| <b>1</b>  | Nb3-126(1)-<br>p110 $\alpha$ (51)      | BS <sup>3</sup> ,<br>DSG | QVQLQESGGGLVQAGH<br>SLR(1)-HELFKEAR(5)                           | 7.22E-<br>13                         | 5.65E-<br>01                      |
| <b>2</b>  | Nb3-126(1)-<br>p110 $\alpha$ (100)     | DSG                      | QVQLQESGGGLVQAGH<br>SLR(1)-<br>LFQPFLKVIEPVGNREE<br>K(7)         | 8.32E-<br>05                         | 1.22E-<br>02                      |
| <b>3</b>  | Nb3-126(1)-<br>p110 $\alpha$ (111)     | BS <sup>3</sup>          | QVQLQESGGGLVQAGH<br>SLR(1)-<br>VIEPVGNREEKILNR(11)               | 2.36E-<br>06                         | 8.73E-<br>02                      |
| <b>4</b>  | Nb3-126(1)-<br>p110 $\alpha$ (148)     | BS <sup>3</sup> ,<br>DSG | QVQLQESGGGLVQAGH<br>SLR(1)-<br>NILNVCKEAVDLR(7)                  | 1.21E-<br>07                         | 1.93E-<br>01                      |
| <b>5</b>  | Nb3-126(1)-<br>p110 $\alpha$ (173)     | BS <sup>3</sup>          | QVQLQESGGGLVQAGH<br>SLR(1)-<br>AMYVYPPNVESSPELPK<br>HIYNK(11)    | 3.08E-<br>05                         | 1.18E-<br>01                      |
| <b>6</b>  | Nb3-126(1)-<br>p110 $\alpha$ (179)     | BS <sup>3</sup>          | QVQLQESGGGLVQAGH<br>SLR(1)-<br>AMYVYPPNVESSPELPK<br>HIYNK(17)    | 4.86E-<br>05                         | 1.11E-<br>01                      |
| <b>7</b>  | Nb3-126(1)-<br>p110 $\alpha$ (260)     | BS <sup>3</sup>          | QVQLQESGGGLVQAGH<br>SLR(1)-<br>VCGCDEYFLEKYPLSQY<br>K(7)         | 1.84E-<br>04                         | 3.27E-<br>05                      |
| <b>8</b>  | Nb3-126(1)-<br>p110 $\alpha$ (264)     | DSG                      | QVQLQESGGGLVQAGH<br>SLR(1)-<br>VCGCDEYFLEKYPLSQY<br>K(11)        | 6.89E-<br>10                         | 3.26E-<br>04                      |
| <b>9</b>  | Nb3-126(1)-<br>p110 $\alpha$ (323)     | DSG                      | QVQLQESGGGLVQAGH<br>SLR(1)-<br>ISTATPYMNGETSTKSL<br>WVINSALR(13) | 6.86E-<br>09                         | 5.60E-<br>04                      |
| <b>10</b> | Nb3-126(1)-<br>p110 $\alpha$ (324)     | BS <sup>3</sup> ,<br>DSG | QVQLQESGGGLVQAGH<br>SLR(1)-<br>ISTATPYMNGETSTKSL<br>WVINSALR(14) | 6.74E-<br>10                         | 4.50E-<br>02                      |
| <b>11</b> | Nb3-126(1)-<br>p110 $\alpha$ (325)     | BS <sup>3</sup> ,<br>DSG | QVQLQESGGGLVQAGH<br>SLR(1)-<br>ISTATPYMNGETSTKSL<br>WVINSALR(15) | 1.96E-<br>10                         | 6.84E-<br>03                      |

|           |                           |                          |                                                                                           |              |              |
|-----------|---------------------------|--------------------------|-------------------------------------------------------------------------------------------|--------------|--------------|
|           |                           |                          | QVQLQESGGGLVQAGH<br>SLR(1)-<br>RISTATPYMNGETSTKS<br>LWVINSALR(16)                         |              |              |
| <b>12</b> | Nb3-126(1)-<br>p110α(337) | BS <sup>3</sup>          | QVQLQESGGGLVQAGH<br>SLR(1)-<br>IKILCATYVNVNIR(2)                                          | 4.95E-<br>06 | 3.89E-<br>01 |
| <b>13</b> | Nb3-126(1)-<br>p110α(353) | BS <sup>3</sup> ,<br>DSG | QVQLQESGGGLVQAGH<br>SLR(1)-DIDKIYVR(4)                                                    | 5.01E-<br>04 | 1.08E-<br>01 |
| <b>14</b> | Nb3-126(1)-<br>p110α(413) | BS <sup>3</sup>          | QVQLQESGGGLVQAGH<br>SLR(1)-<br>KGAKEEHCP LAWGNINL<br>FDYTDTLVSGK(1)                       | 4.45E-<br>06 | 5.00E-<br>03 |
| <b>15</b> | Nb3-126(1)-<br>p110α(416) | BS <sup>3</sup>          | QVQLQESGGGLVQAGH<br>SLR(1)-<br>KGAKEEHCP LAWGNINL<br>FDYTDTLVSGK(4)                       | 1.55E-<br>11 | 8.05E-<br>04 |
| <b>16</b> | Nb3-126(1)-<br>p110α(507) | BS <sup>3</sup> ,<br>DSG | QVQLQESGGGLVQAGH<br>SLR(1)-<br>EAGFSYSHAGLSNR(5)                                          | 1.76E-<br>08 | 3.50E-<br>01 |
| <b>17</b> | Nb3-126(1)-<br>p110α(509) | BS <sup>3</sup>          | QVQLQESGGGLVQAGH<br>SLR(1)-<br>EAGFSYSHAGLSNR(7)                                          | 6.18E-<br>05 | 1.57E-<br>05 |
| <b>18</b> | Nb3-126(1)-<br>p110α(528) | BS <sup>3</sup> ,<br>DSG | QVQLQESGGGLVQAGH<br>SLR(1)-<br>DNELRENDKEQLK(9)<br>QVQLQESGGGLVQAGH<br>SLR(1)-ENDKEQLK(4) | 2.88E-<br>06 | 3.69E-<br>02 |
| <b>19</b> | Nb3-126(1)-<br>p110α(656) | BS <sup>3</sup>          | QVQLQESGGGLVQAGH<br>SLR(1)-KALTNQR(1)                                                     | 5.31E-<br>06 | 5.60E-<br>02 |
| <b>20</b> | Nb3-126(1)-<br>p110α(700) | DSG                      | QVQLQESGGGLVQAGH<br>SLR(1)-<br>ACGMYLKHLNR(7)                                             | 3.90E-<br>07 | 6.36E-<br>01 |
| <b>21</b> | Nb3-126(1)-<br>p110α(729) | BS <sup>3</sup>          | QVQLQESGGGLVQAGH<br>SLR(1)-<br>KDETQKVQMK(6)                                              | 4.48E-<br>04 | 7.91E-<br>04 |
| <b>22</b> | Nb3-126(1)-<br>p110α(733) | BS <sup>3</sup>          | QVQLQESGGGLVQAGH<br>SLR(1)-<br>VQMKFLVEQMR(4)                                             | 3.02E-<br>09 | 1.52E-<br>02 |
| <b>23</b> | Nb3-126(1)-<br>p110α(972) | BS <sup>3</sup>          | QVQLQESGGGLVQAGH<br>SLR(1)-GAQECTK(6)                                                     | 2.73E-<br>05 | 4.39E-<br>02 |
| <b>24</b> | Nb3-126(1)-<br>p110α(985) | BS <sup>3</sup> ,<br>DSG | QVQLQESGGGLVQAGH<br>SLR(1)-<br>FQEMCYKAYLAIR(6)                                           | 6.96E-<br>05 | 1.20E-<br>01 |



|    |                        |                          |                                                                                   |          |          |
|----|------------------------|--------------------------|-----------------------------------------------------------------------------------|----------|----------|
| 25 | Nb3-126(1)-p110α(986)  | BS <sup>3</sup>          | QVQLQESGGGLVQAGH<br>SLR(1)-<br>FQEMCYKAYLAIR(7)                                   | 1.80E-07 | 7.85E-03 |
| 26 | Nb3-126(1)-p110α(1030) | BS <sup>3</sup> ,<br>DSG | QVQLQESGGGLVQAGH<br>SLR(1)-<br>TLALDKTEQEALEYFMK<br>(6)                           | 7.13E-14 | 3.44E-02 |
| 27 | Nb3-126(1)-p110α(1041) | BS <sup>3</sup>          | QVQLQESGGGLVQAGH<br>SLR(1)-<br>TLALDKTEQEALEYFMK<br>QMNDAAHHGGWTTK(17)            | 2.00E-06 | 1.53E-01 |
| 28 | Nb3-126(1)-p110α(1063) | BS <sup>3</sup>          | QVQLQESGGGLVQAGH<br>SLR(1)-<br>MDWIFHTIKQHALN(9)                                  | 9.79E-11 | 1.53E-03 |
| 29 | Nb3-126(1)-p85α(14)    | BS <sup>3</sup> ,<br>DSG | QVQLQESGGGLVQAGH<br>SLR(1)-ALYDYKK(6)                                             | 8.99E-08 | 3.91E-01 |
| 30 | Nb3-126(1)-p85α(15)    | BS <sup>3</sup>          | QVQLQESGGGLVQAGH<br>SLR(1)-<br>KEREEDIDLHLGDILTVN<br>K(1)                         | 2.46E-05 | 6.04E-02 |
| 31 | Nb3-126(1)-p85α(80)    | BS <sup>3</sup> ,<br>DSG | QVQLQESGGGLVQAGH<br>SLR(1)-KISPPTPK(1)<br>QVQLQESGGGLVQAGH<br>SLR(1)-KKISPPTPK(2) | 1.00E-11 | 3.65E-01 |
| 32 | Nb3-126(1)-p85α(140)   | BS <sup>3</sup>          | QVQLQESGGGLVQAGH<br>SLR(1)-LVEAIEKK(7)                                            | 1.56E-04 | 3.76E-01 |
| 33 | Nb3-126(1)-p85α(141)   | BS <sup>3</sup> ,<br>DSG | QVQLQESGGGLVQAGH<br>SLR(1)-KGLECSTLYR(1)                                          | 2.71E-11 | 4.74E-02 |
| 34 | Nb3-126(1)-p85α(254)   | DSG                      | QVQLQESGGGLVQAGH<br>SLR(1)-<br>LSQTSSKNLLNAR(6)                                   | 4.69E-04 | 6.73E-01 |
| 35 | Nb3-126(1)-p85α(255)   | BS <sup>3</sup>          | QVQLQESGGGLVQAGH<br>SLR(1)-<br>LSQTSSKNLLNAR(7)                                   | 1.62E-05 | 1.56E-03 |
| 36 | Nb3-126(1)-p85α(361)   | BS <sup>3</sup>          | QVQLQESGGGLVQAGH<br>SLR(1)-<br>DASTKMHGDYTLTLR(4)                                 | 1.94E-14 | 6.96E-01 |
| 37 | Nb3-126(1)-p85α(388)   | BS <sup>3</sup> ,<br>DSG | QVQLQESGGGLVQAGH<br>SLR(1)-<br>DGKYGFSDPLTFSSVVE<br>LINHYR(3)                     | 3.24E-15 | 3.60E-02 |
| 38 | Nb3-126(1)-p85α(389)   | BS <sup>3</sup>          | QVQLQESGGGLVQAGH<br>SLR(1)-<br>YGFSDPLTFSSVELIN<br>HYR(1)                         | 2.21E-11 | 2.27E-03 |

|    |                      |                          |                                                                                                                     |          |          |
|----|----------------------|--------------------------|---------------------------------------------------------------------------------------------------------------------|----------|----------|
| 39 | Nb3-126(1)-p85α(392) | BS <sup>3</sup>          | QVQLQESGGGLVQAGH<br>SLR(1)-<br>YGFSDPLTFSSVVELIN<br>HYR(4)                                                          | 4.63E-12 | 2.34E-03 |
| 40 | Nb3-126(1)-p85α(398) | BS <sup>3</sup>          | QVQLQESGGGLVQAGH<br>SLR(1)-<br>YGFSDPLTFSSVVELIN<br>HYR(10)                                                         | 1.03E-04 | 4.41E-03 |
| 41 | Nb3-126(1)-p85α(491) | DSG                      | QVQLQESGGGLVQAGH<br>SLR(1)-<br>TAIEAFNETIKIFEEQCQ<br>TQER(11)                                                       | 7.29E-22 | 2.18E-02 |
| 42 | Nb3-126(1)-p85α(652) | BS <sup>3</sup>          | QVQLQESGGGLVQAGH<br>SLR(1)-<br>ESSKQGCYACSVVVDG<br>EVK(4)                                                           | 3.68E-08 | 5.03E-05 |
| 43 | Nb3-126(1)-p85α(673) | BS <sup>3</sup>          | QVQLQESGGGLVQAGH<br>SLR(1)-<br>HCVINKTATGYGFAEPY<br>NLYSSLK(6)                                                      | 1.71E-09 | 5.05E-05 |
| 44 | Nb3-126(1)-p85α(674) | BS <sup>3</sup> ,<br>DSG | QVQLQESGGGLVQAGH<br>SLR(1)-<br>HCVINKTATGYGFAEPY<br>NLYSSLK(7)                                                      | 1.74E-19 | 1.40E-03 |
| 45 | Nb3-126(1)-p85α(418) | BS <sup>3</sup> ,<br>DSG | QVQLQESGGGLVQAGH<br>SLR(1)-<br>NESLAQYNPKLDVK(10)                                                                   | 7.28E-08 | 6.73E-01 |
| 46 | Nb3-126(1)-p85α(422) | BS <sup>3</sup> ,<br>DSG | QVQLQESGGGLVQAGH<br>SLR(1)-<br>LDVKLLYPVSK(4)                                                                       | 9.54E-12 | 5.07E-01 |
| 47 | Nb3-126(1)-p85α(437) | BS <sup>3</sup> ,<br>DSG | QVQLQESGGGLVQAGH<br>SLR(1)-<br>YQQDQVVKEDNIEAVG<br>K(8)<br>QVQLQESGGGLVQAGH<br>SLR(1)-<br>YQQDQVVKEDNIEAVG<br>KK(8) | 2.11E-11 | 6.77E-03 |
| 48 | Nb3-126(1)-p85α(446) | BS <sup>3</sup>          | QVQLQESGGGLVQAGH<br>SLR(1)-<br>YQQDQVVKEDNIEAVG<br>KK(17)<br>QVQLQESGGGLVQAGH<br>SLR(1)-EDNIEAVGKK(9)               | 1.73E-06 | 2.11E-01 |

|    |                        |                          |                                                                                                       |          |          |
|----|------------------------|--------------------------|-------------------------------------------------------------------------------------------------------|----------|----------|
| 49 | Nb3-126(1)-p85α(447)   | BS <sup>3</sup>          | QVQLQESGGGLVQAGH<br>SLR(1)-<br>KLHEYNTQFQEK(1)                                                        | 1.45E-15 | 9.73E-03 |
| 50 | Nb3-126(1)-p85α(458)   | BS <sup>3</sup> ,<br>DSG | QVQLQESGGGLVQAGH<br>SLR(1)-<br>LHEYNTQFQEKSR(11)<br>QVQLQESGGGLVQAGH<br>SLR(1)-<br>KLHEYNTQFQEKSR(12) | 6.08E-11 | 2.84E-01 |
| 51 | Nb3-126(1)-p85α(504)   | BS <sup>3</sup> ,<br>DSG | QVQLQESGGGLVQAGH<br>SLR(1)-YSKEYIEK(2)                                                                | 1.54E-09 | 3.91E-01 |
| 52 | Nb3-126(1)-p85α(529)   | BS <sup>3</sup>          | QVQLQESGGGLVQAGH<br>SLR(1)-IMHNYDKLK(7)                                                               | 4.76E-08 | 2.00E-02 |
| 53 | Nb3-126(1)-p85α(549)   | BS <sup>3</sup> ,<br>DSG | QVQLQESGGGLVQAGH<br>SLR(1)-RLEEDLKK(7)                                                                | 2.58E-08 | 4.66E-01 |
| 54 | Nb3-126(1)-p85α(550)   | BS <sup>3</sup> ,<br>DSG | QVQLQESGGGLVQAGH<br>SLR(1)-KQAAEYR(1)                                                                 | 9.35E-13 | 1.92E-01 |
| 55 | Nb3-126(1)-p85α(566)   | BS <sup>3</sup> ,<br>DSG | QVQLQESGGGLVQAGH<br>SLR(1)-<br>MNSIKPDLIQLR(5)                                                        | 5.48E-08 | 6.02E-01 |
| 56 | Nb3-126(1)-p85α(584)   | BS <sup>3</sup> ,<br>DSG | QVQLQESGGGLVQAGH<br>SLR(1)-<br>DQYLMWLTQKGV(8)<br>QVQLQESGGGLVQAGH<br>SLR(1)-<br>TRDQYLMWLTQKGV(10)   | 5.70E-07 | 1.86E-01 |
| 57 | Nb3-126(1)-p85α(586)   | BS <sup>3</sup> ,<br>DSG | QVQLQESGGGLVQAGH<br>SLR(1)-<br>DQYLMWLTQKGV(10)<br>QVQLQESGGGLVQAGH<br>SLR(1)-<br>TRDQYLMWLTQKGV(12)  | 1.35E-17 | 6.51E-01 |
| 58 | Nb3-126(1)-p85α(632)   | BS <sup>3</sup> ,<br>DSG | QVQLQESGGGLVQAGH<br>SLR(1)-NKAENLLR(2)                                                                | 7.47E-11 | 6.34E-01 |
| 59 | Nb3-126(25)-p110α(972) | DSG                      | LSCAASGR(6)-<br>GAQECTKTR(6)                                                                          | 1.58E-08 | 3.28E-01 |
| 60 | Nb3-126(25)-p85α(518)  | DSG                      | LSCAASGR(6)-<br>EGNEKEIQR(5)                                                                          | 3.84E-08 | 5.80E-01 |
| 61 | Nb3-126(25)-p85α(632)  | BS <sup>3</sup> ,<br>DSG | LSCAASGR(6)-<br>NKAENLLR(2)                                                                           | 8.78E-10 | 1.04E-01 |
| 62 | Nb3-126(43)-p85α(14)   | DSG                      | RAPGKER(5)-<br>ALYDYKK(6)<br>APGKER(4)-<br>ALYDYKK(6)                                                 | 2.73E-14 | 7.98E-01 |

|    |                             |                          |                                                                       |              |              |
|----|-----------------------------|--------------------------|-----------------------------------------------------------------------|--------------|--------------|
| 63 | Nb3-126(43)-<br>p85α(80)    | DSG                      | RAPGKER(5)-<br>KISPPTPK(1)                                            | 1.23E-<br>08 | 7.81E-<br>01 |
| 64 | Nb3-126(43)-<br>p85α(549)   | DSG                      | RAPGKER(5)-<br>RLEEDLKK(7)<br>RAPGKER(5)-<br>LEEDLKK(6)               | 8.23E-<br>10 | 6.66E-<br>01 |
| 65 | Nb3-126(43)-<br>p85α(550)   | DSG                      | RAPGKER(5)-<br>KQAAEYR(1)<br>APGKER(4)-<br>KQAAEYR(1)                 | 5.57E-<br>05 | 7.88E-<br>01 |
| 66 | Nb3-126(43)-<br>p85α(632)   | DSG                      | RAPGKER(5)-<br>NKAENLLR(2)<br>APGKER(4)-<br>NKAENLLR(2)               | 3.01E-<br>08 | 7.43E-<br>01 |
| 67 | Nb3-126(52)-<br>p110α(51)   | BS <sup>3</sup>          | EFVAGISKGENYR(7)-<br>HELFKEAR(5)                                      | 4.17E-<br>13 | 4.43E-<br>01 |
| 68 | Nb3-126(52)-<br>p110α(353)  | BS <sup>3</sup> ,<br>DSG | EFVAGISKGENYR(7)-<br>DIDKIYVR(4)                                      | 3.57E-<br>05 | 4.25E-<br>01 |
| 69 | Nb3-126(52)-<br>p110α(416)  | BS <sup>3</sup>          | EFVAGISKGENYR(7)-<br>KGAKEEHCP LAWGNINL<br>FDYTDTLVSGK(4)             | 1.47E-<br>07 | 1.37E-<br>02 |
| 70 | Nb3-126(52)-<br>p110α(507)  | BS <sup>3</sup>          | EFVAGISKGENYR(7)-<br>EAGFSYSHAGLSNR(5)                                | 6.76E-<br>07 | 2.80E-<br>01 |
| 71 | Nb3-126(52)-<br>p110α(528)  | DSG                      | EFVAGISKGENYR(7)-<br>DNELRENDKEQLK(9)                                 | 7.33E-<br>04 | 5.94E-<br>01 |
| 72 | Nb3-126(52)-<br>p110α(985)  | BS <sup>3</sup>          | EFVAGISKGENYR(7)-<br>FQEMCYKAYLAIR(6)                                 | 4.44E-<br>04 | 9.24E-<br>02 |
| 73 | Nb3-126(52)-<br>p110α(986)  | BS <sup>3</sup> ,<br>DSG | EFVAGISKGENYR(7)-<br>FQEMCYKAYLAIR(7)                                 | 1.38E-<br>09 | 6.57E-<br>01 |
| 74 | Nb3-126(52)-<br>p110α(1061) | BS <sup>3</sup>          | EFVAGISKGENYR(7)-<br>MDWIFHTIKQHALN(7)                                | 5.73E-<br>05 | 1.15E-<br>02 |
| 75 | Nb3-126(52)-<br>p110α(1063) | BS <sup>3</sup>          | EFVAGISKGENYR(7)-<br>MDWIFHTIKQHALN(9)                                | 1.48E-<br>05 | 3.32E-<br>01 |
| 76 | Nb3-126(52)-<br>p85α(80)    | BS <sup>3</sup>          | EFVAGISKGENYR(7)-<br>KISPPTPK(1)<br>EFVAGISKGENYR(7)-<br>KKISPPTPK(2) | 1.96E-<br>05 | 2.49E-<br>01 |
| 77 | Nb3-126(52)-<br>p85α(287)   | DSG                      | EFVAGISKGENYR(7)-<br>FSAASSDNTENLIKVIEIL<br>ISTEWNER(14)              | 6.62E-<br>04 | 5.08E-<br>01 |
| 78 | Nb3-126(52)-<br>p85α(504)   | BS <sup>3</sup> ,<br>DSG | EFVAGISKGENYR(7)-<br>YSKEYIEK(2)                                      | 1.25E-<br>07 | 2.06E-<br>01 |
| 79 | Nb3-126(52)-<br>p85α(505)   | BS <sup>3</sup>          | EFVAGISKGENYR(7)-<br>YSKEYIEK(3)                                      | 1.33E-<br>04 | 1.92E-<br>03 |
| 80 | Nb3-126(52)-<br>p85α(518)   | BS <sup>3</sup>          | EFVAGISKGENYR(7)-<br>EGNEKEIQR(5)                                     | 3.21E-<br>04 | 3.14E-<br>01 |

|     |                            |                          |                                                           |              |              |
|-----|----------------------------|--------------------------|-----------------------------------------------------------|--------------|--------------|
| 81  | Nb3-126(52)-<br>p85α(529)  | BS <sup>3</sup> ,<br>DSG | EFVAGISKGENYR(7)-<br>IMHNYDKLK(7)                         | 6.47E-<br>07 | 5.56E-<br>01 |
| 82  | Nb3-126(52)-<br>p85α(550)  | DSG                      | EFVAGISKGENYR(7)-<br>KQAAEYR(1)                           | 8.58E-<br>18 | 4.84E-<br>01 |
| 83  | Nb3-126(52)-<br>p85α(632)  | BS <sup>3</sup> ,<br>DSG | EFVAGISKGENYR(7)-<br>NKAENLLR(2)                          | 9.18E-<br>06 | 3.33E-<br>01 |
| 84  | Nb3-126(53)-<br>p110α(51)  | BS <sup>3</sup>          | EFVAGISKGENYR(8)-<br>HELKFKEAR(5)                         | 8.80E-<br>13 | 1.54E-<br>01 |
| 85  | Nb3-126(53)-<br>p110α(353) | BS <sup>3</sup> ,<br>DSG | EFVAGISKGENYR(8)-<br>DIDKIYVR(4)                          | 2.20E-<br>07 | 8.15E-<br>01 |
| 86  | Nb3-126(53)-<br>p110α(416) | BS <sup>3</sup>          | EFVAGISKGENYR(8)-<br>KGAKEEHCP LAWGNINL<br>FDYTDTLVSGK(4) | 7.50E-<br>05 | 4.11E-<br>01 |
| 87  | Nb3-126(53)-<br>p110α(972) | BS <sup>3</sup>          | EFVAGISKGENYR(8)-<br>GAQECTKTR(6)                         | 9.70E-<br>04 | 4.48E-<br>01 |
| 88  | Nb3-126(53)-<br>p110α(985) | BS <sup>3</sup> ,<br>DSG | EFVAGISKGENYR(8)-<br>FQEMCYKAYLAIR(6)                     | 5.60E-<br>11 | 1.65E-<br>01 |
| 89  | Nb3-126(53)-<br>p110α(986) | BS <sup>3</sup> ,<br>DSG | EFVAGISKGENYR(8)-<br>FQEMCYKAYLAIR(7)                     | 1.01E-<br>12 | 2.62E-<br>04 |
| 90  | Nb3-126(53)-<br>p85α(14)   | BS <sup>3</sup> ,<br>DSG | EFVAGISKGENYR(8)-<br>ALYDYKK(6)                           | 2.26E-<br>06 | 2.02E-<br>01 |
| 91  | Nb3-126(53)-<br>p85α(80)   | BS <sup>3</sup>          | EFVAGISKGENYR(8)-<br>KISPPTPK(1)                          | 7.07E-<br>05 | 2.17E-<br>01 |
| 92  | Nb3-126(53)-<br>p85α(381)  | BS <sup>3</sup>          | EFVAGISKGENYR(8)-<br>LIKIFHR(3)                           | 1.35E-<br>06 | 5.50E-<br>01 |
| 93  | Nb3-126(53)-<br>p85α(447)  | BS <sup>3</sup>          | EFVAGISKGENYR(8)-<br>KLHEYNTQFQEK(1)                      | 6.65E-<br>04 | 4.92E-<br>01 |
| 94  | Nb3-126(53)-<br>p85α(503)  | DSG                      | EFVAGISKGENYR(8)-<br>YSKEYIEK(1)                          | 5.09E-<br>04 | 4.60E-<br>02 |
| 95  | Nb3-126(53)-<br>p85α(504)  | DSG                      | EFVAGISKGENYR(8)-<br>YSKEYIEK(2)                          | 9.01E-<br>08 | 6.62E-<br>03 |
| 96  | Nb3-126(53)-<br>p85α(505)  | BS <sup>3</sup>          | EFVAGISKGENYR(8)-<br>YSKEYIEK(3)                          | 1.33E-<br>06 | 7.98E-<br>03 |
| 97  | Nb3-126(53)-<br>p85α(518)  | BS <sup>3</sup> ,<br>DSG | EFVAGISKGENYR(8)-<br>EGNEKEIQR(5)                         | 1.04E-<br>04 | 6.21E-<br>01 |
| 98  | Nb3-126(53)-<br>p85α(529)  | BS <sup>3</sup> ,<br>DSG | EFVAGISKGENYR(8)-<br>IMHNYDKLK(7)                         | 9.61E-<br>07 | 1.40E-<br>01 |
| 99  | Nb3-126(53)-<br>p85α(550)  | DSG                      | EFVAGISKGENYR(8)-<br>KQAAEYR(1)                           | 3.22E-<br>10 | 7.37E-<br>01 |
| 100 | Nb3-126(53)-<br>p85α(632)  | BS <sup>3</sup> ,<br>DSG | EFVAGISKGENYR(8)-<br>NKAENLLR(2)                          | 1.79E-<br>10 | 8.21E-<br>02 |
| 101 | Nb3-126(63)-<br>p110α(51)  | DSG                      | SYADSVKGR(5)-<br>HELKFKEAR(5)                             | 5.75E-<br>08 | 4.95E-<br>01 |
| 102 | Nb3-126(63)-<br>p85α(437)  | DSG                      | SYADSVKGR(5)-<br>YQQDQVVKEDNIEAVG<br>K(8)                 | 1.84E-<br>05 | 4.86E-<br>01 |

|     |                            |                          |                                                                       |              |              |
|-----|----------------------------|--------------------------|-----------------------------------------------------------------------|--------------|--------------|
| 103 | Nb3-126(65)-<br>p110α(353) | BS <sup>3</sup> ,<br>DSG | SYADSVKGR(7)-<br>DIDKIYVR(4)                                          | 8.95E-<br>12 | 8.04E-<br>01 |
| 104 | Nb3-126(65)-<br>p110α(973) | DSG                      | SYADSVKGR(7)-<br>GAQECTKTR(7)                                         | 1.60E-<br>15 | 2.98E-<br>01 |
| 105 | Nb3-126(65)-<br>p85α(14)   | DSG                      | SYADSVKGR(7)-<br>ALYDYKK(6)                                           | 2.10E-<br>11 | 6.97E-<br>01 |
| 106 | Nb3-126(65)-<br>p85α(254)  | DSG                      | SYADSVKGR(7)-<br>LSQTSSKNLLNAR(6)                                     | 1.94E-<br>04 | 2.27E-<br>01 |
| 107 | Nb3-126(65)-<br>p85α(446)  | DSG                      | SYADSVKGR(7)-<br>EDNIEAVGKK(9)                                        | 1.03E-<br>08 | 2.96E-<br>01 |
| 108 | Nb3-126(65)-<br>p85α(504)  | BS <sup>3</sup> ,<br>DSG | SYADSVKGR(7)-<br>YSKEYIEK(2)                                          | 3.73E-<br>05 | 3.79E-<br>01 |
| 109 | Nb3-126(65)-<br>p85α(518)  | DSG                      | SYADSVKGR(7)-<br>EGNEKEIQR(5)                                         | 1.75E-<br>13 | 2.98E-<br>01 |
| 110 | Nb3-126(65)-<br>p85α(550)  | DSG                      | SYADSVKGR(7)-<br>KQAAEYR(1)                                           | 3.95E-<br>04 | 4.72E-<br>01 |
| 111 | Nb3-126(65)-<br>p85α(632)  | BS <sup>3</sup> ,<br>DSG | SYADSVKGR(7)-<br>NKAENLLR(2)                                          | 3.77E-<br>14 | 6.22E-<br>01 |
| 112 | Nb3-126(65)-<br>p85α(650)  | DSG                      | SYADSVKGR(7)-<br>ESSKQGCYACSVVVDG<br>EVK(2)                           | 2.34E-<br>04 | 1.59E-<br>02 |
| 113 | Nb3-126(76)-<br>p110α(353) | DSG                      | DNAKSTVYLQMNSLKP<br>DDAAVYYCAAK(4)-<br>DIDKIYVR(4)                    | 5.95E-<br>04 | 8.12E-<br>01 |
| 114 | Nb3-126(76)-<br>p85α(388)  | DSG                      | DNAKSTVYLQMNSLKP<br>DDAAVYYCAAK(4)-<br>DGKYGFSDPLTFSSVVE<br>LINHYR(3) | 2.19E-<br>08 | 3.17E-<br>05 |
| 115 | Nb3-126(85)-<br>p85α(632)  | DSG                      | STVYLQMNSLKPDDAA<br>VYYCAAK(9)-<br>NKAENLLR(2)                        | 1.76E-<br>06 | 5.23E-<br>01 |

<sup>a</sup>E-value means normalized refined\_scores for filtered peptide spectrum matches (PSMs) by FDR, the smaller the more confident. Best E-value is the smallest E-value of all spectra of the cross-linked peptide. <sup>b</sup>Score, which is short for SVM score in pLink 2, is the prime measure for FDR estimation. Best score is the smallest value of all spectra of the cross-linked peptide.

**Table S2.** Inter-protein cross-links identified between PI3K $\alpha$  and Nb3-142.

| <b>Nb3-142</b> |                                 |                       |                                |                                 |                               |
|----------------|---------------------------------|-----------------------|--------------------------------|---------------------------------|-------------------------------|
|                | <b>Cross-link pair</b>          | <b>Linker</b>         | <b>Peptide sequence</b>        | <b>Best E-value<sup>a</sup></b> | <b>Best score<sup>b</sup></b> |
| <b>1</b>       | Nb3-142(43)-p85 $\alpha$ (632)  | DSG                   | QTPGKER(5)-NKAENLLR(2)         | 6.58E-05                        | 6.97E-01                      |
| <b>2</b>       | Nb3-142(60)-p85 $\alpha$ (80)   | DSG                   | YADSVKGR(1)-KISPPTPK(1)        | 8.59E-04                        | 4.86E-01                      |
| <b>3</b>       | Nb3-142(63)-p110 $\alpha$ (51)  | BS <sup>3</sup>       | YADSVKGR(4)-HELFKEAR(5)        | 1.65E-06                        | 8.14E-01                      |
| <b>4</b>       | Nb3-142(63)-p85 $\alpha$ (418)  | DSG                   | YADSVKGR(4)-NESLAQYNPKLDVK(10) | 1.94E-06                        | 5.34E-01                      |
| <b>5</b>       | Nb3-142(65)-p110 $\alpha$ (51)  | DSG                   | YADSVKGR(6)-HELFKEAR(5)        | 6.13E-09                        | 4.58E-01                      |
| <b>6</b>       | Nb3-142(65)-p110 $\alpha$ (353) | BS <sup>3</sup> , DSG | YADSVKGR(6)-DIDKIYVR(4)        | 5.75E-13                        | 4.27E-01                      |
| <b>7</b>       | Nb3-142(65)-p110 $\alpha$ (973) | DSG                   | YADSVKGR(6)-GAQECTKTR(7)       | 7.79E-15                        | 8.02E-02                      |
| <b>8</b>       | Nb3-142(65)-p85 $\alpha$ (14)   | BS <sup>3</sup> , DSG | YADSVKGR(6)-ALYDYKK(6)         | 5.33E-11                        | 5.17E-01                      |
| <b>9</b>       | Nb3-142(65)-p85 $\alpha$ (80)   | BS <sup>3</sup> , DSG | YADSVKGR(6)-KISPPTPK(1)        | 2.94E-07                        | 8.16E-01                      |
| <b>10</b>      | Nb3-142(65)-p85 $\alpha$ (418)  | DSG                   | YADSVKGR(6)-NESLAQYNPKLDVK(10) | 1.98E-07                        | 4.21E-01                      |
| <b>11</b>      | Nb3-142(65)-p85 $\alpha$ (422)  | DSG                   | YADSVKGR(6)-LDVKLLYPVSK(4)     | 8.29E-04                        | 2.10E-01                      |
| <b>12</b>      | Nb3-142(65)-p85 $\alpha$ (549)  | DSG                   | YADSVKGR(6)-LEEDLKK(6)         | 1.62E-07                        | 6.66E-01                      |
| <b>13</b>      | Nb3-142(65)-p85 $\alpha$ (550)  | DSG                   | YADSVKGR(6)-KQAAEYR(1)         | 5.37E-08                        | 3.54E-01                      |
| <b>14</b>      | Nb3-142(65)-p85 $\alpha$ (632)  | BS <sup>3</sup> , DSG | YADSVKGR(6)-NKAENLLR(2)        | 1.97E-15                        | 6.94E-01                      |
| <b>15</b>      | Nb3-142(65)-p85 $\alpha$ (650)  | DSG                   | YADSVKGR(6)-ESSKQGCVVVDGEVK(2) | 3.96E-04                        | 9.66E-02                      |
| <b>16</b>      | Nb3-142(65)-p85 $\alpha$ (651)  | DSG                   | YADSVKGR(6)-ESSKQGCVVVDGEVK(3) | 6.11E-04                        | 1.86E-01                      |

<sup>a</sup>E-value means normalized refined\_scores for filtered peptide spectrum matches (PSMs) by FDR, the smaller the more confident. Best E-value is the smallest E-value of all spectra of the cross-linked peptide. <sup>b</sup>Score, which is short for SVM score in pLink 2, is the prime measure for FDR estimation. Best score is the smallest value of all spectra of the cross-linked peptide.

**Table S3.** Inter-protein cross-links identified between PI3K $\alpha$  and Nb3-159.

| <b>Nb3-159</b> |                                 |                          |                                                                                   |                                 |                               |
|----------------|---------------------------------|--------------------------|-----------------------------------------------------------------------------------|---------------------------------|-------------------------------|
|                | <b>Cross-link pair</b>          | <b>Linker</b>            | <b>Peptide sequence</b>                                                           | <b>Best E-value<sup>a</sup></b> | <b>Best score<sup>b</sup></b> |
| <b>1</b>       | Nb3-159(1)-p110 $\alpha$ (51)   | BS <sup>3</sup> ,<br>DSG | QVQLQESGGGLVQTGGS<br>LR(1)-HELKFEAR(5)                                            | 1.75E-12                        | 5.29E-01                      |
| <b>2</b>       | Nb3-159(1)-p110 $\alpha$ (353)  | BS <sup>3</sup> ,        | QVQLQESGGGLVQTGGS<br>LR(1)-DIDKIYVR(4)                                            | 2.40E-04                        | 5.56E-02                      |
| <b>3</b>       | Nb3-159(1)-p110 $\alpha$ (507)  | BS <sup>3</sup> ,<br>DSG | QVQLQESGGGLVQTGGS<br>LR(1)-<br>EAGFSYSHAGLSNR(5)                                  | 1.17E-07                        | 1.78E-02                      |
| <b>4</b>       | Nb3-159(1)-p110 $\alpha$ (528)  | BS <sup>3</sup> ,<br>DSG | QVQLQESGGGLVQTGGS<br>LR(1)-<br>DNELRENDKEQLK(9)                                   | 1.63E-05                        | 2.78E-02                      |
| <b>5</b>       | Nb3-159(1)-p110 $\alpha$ (532)  | DSG                      | QVQLQESGGGLVQTGGS<br>LR(1)-<br>ENDKEQLKAISTR(8)                                   | 1.33E-05                        | 5.67E-01                      |
| <b>6</b>       | Nb3-159(1)-p110 $\alpha$ (973)  | BS <sup>3</sup>          | QVQLQESGGGLVQTGGS<br>LR(1)-GAQECTKTR(7)                                           | 5.24E-04                        | 3.26E-04                      |
| <b>7</b>       | Nb3-159(1)-p110 $\alpha$ (1063) | BS <sup>3</sup> ,<br>DSG | QVQLQESGGGLVQTGGS<br>LR(1)-<br>MDWIFHTIKQHALN(9)                                  | 9.30E-11                        | 8.14E-01                      |
| <b>8</b>       | Nb3-159(1)-p85 $\alpha$ (14)    | BS <sup>3</sup>          | QVQLQESGGGLVQTGGS<br>LR(1)-ALYDYKK(6)                                             | 2.41E-05                        | 2.25E-02                      |
| <b>9</b>       | Nb3-159(1)-p85 $\alpha$ (80)    | BS <sup>3</sup> ,<br>DSG | QVQLQESGGGLVQTGGS<br>LR(1)-KISPPTPK(1)<br>QVQLQESGGGLVQTGGS<br>LR(1)-KKISPPTPK(2) | 9.89E-11                        | 4.84E-01                      |
| <b>10</b>      | Nb3-159(1)-p85 $\alpha$ (253)   | BS <sup>3</sup>          | QVQLQESGGGLVQTGGS<br>LR(1)-<br>LSQTSSKNLLNAR(5)                                   | 9.35E-04                        | 1.09E-03                      |
| <b>11</b>      | Nb3-159(1)-p85 $\alpha$ (254)   | BS <sup>3</sup>          | QVQLQESGGGLVQTGGS<br>LR(1)-<br>LSQTSSKNLLNAR(6)                                   | 5.78E-05                        | 1.85E-02                      |
| <b>12</b>      | Nb3-159(1)-p85 $\alpha$ (255)   | BS <sup>3</sup>          | QVQLQESGGGLVQTGGS<br>LR(1)-<br>LSQTSSKNLLNAR(7)                                   | 2.32E-04                        | 1.27E-01                      |
| <b>13</b>      | Nb3-159(1)-p85 $\alpha$ (361)   | DSG                      | QVQLQESGGGLVQTGGS<br>LR(1)-<br>DASTKMHGDYTLTLR(4)                                 | 1.06E-04                        | 2.65E-02                      |
| <b>14</b>      | Nb3-159(1)-p85 $\alpha$ (381)   | BS <sup>3</sup> ,<br>DSG | QVQLQESGGGLVQTGGS<br>LR(1)-LIKIFHR(3)                                             | 4.94E-09                        | 6.65E-01                      |
| <b>15</b>      | Nb3-159(1)-p85 $\alpha$ (389)   | BS <sup>3</sup>          | QVQLQESGGGLVQTGGS<br>LR(1)-<br>YGFSDPLTFSSVVELINHY<br>R(1)                        | 9.37E-12                        | 5.51E-13                      |



|    |                      |                       |                                                                                                 |          |          |
|----|----------------------|-----------------------|-------------------------------------------------------------------------------------------------|----------|----------|
| 16 | Nb3-159(1)-p85α(392) | BS <sup>3</sup>       | QVQLQESGGGLVQTGGS LR(1)- YGFSDPLTFSSVVELINHY R(4)                                               | 5.63E-04 | 1.14E-04 |
| 17 | Nb3-159(1)-p85α(398) | BS <sup>3</sup>       | QVQLQESGGGLVQTGGS LR(1)- YGFSDPLTFSSVVELINHY R(10)                                              | 7.53E-05 | 7.82E-02 |
| 18 | Nb3-159(1)-p85α(399) | BS <sup>3</sup>       | QVQLQESGGGLVQTGGS LR(1)- YGFSDPLTFSSVVELINHY R(11)                                              | 5.87E-09 | 7.18E-02 |
| 19 | Nb3-159(1)-p85α(418) | BS <sup>3</sup> , DSG | QVQLQESGGGLVQTGGS LR(1)- NESLAQYNPKLDVK(10)                                                     | 1.96E-09 | 1.28E-04 |
| 20 | Nb3-159(1)-p85α(422) | BS <sup>3</sup> , DSG | QVQLQESGGGLVQTGGS LR(1)-LDVKLLYPVSK(4)                                                          | 6.27E-09 | 9.73E-02 |
| 21 | Nb3-159(1)-p85α(437) | BS <sup>3</sup> , DSG | QVQLQESGGGLVQTGGS LR(1)- YQQDQVVKEDNIEAVGK(8)<br>QVQLQESGGGLVQTGGS LR(1)- YQQDQVVKEDNIEAVGKK(8) | 2.30E-13 | 5.17E-04 |
| 22 | Nb3-159(1)-p85α(446) | BS <sup>3</sup> , DSG | QVQLQESGGGLVQTGGS LR(1)- YQQDQVVKEDNIEAVGKK(17)<br>QVQLQESGGGLVQTGGS LR(1)-EDNIEAVGKK(9)        | 1.93E-08 | 1.57E-02 |
| 23 | Nb3-159(1)-p85α(447) | DSG                   | QVQLQESGGGLVQTGGS LR(1)-KLHEYNTQFQEK(1)                                                         | 9.61E-06 | 2.85E-02 |
| 24 | Nb3-159(1)-p85α(458) | DSG                   | QVQLQESGGGLVQTGGS LR(1)- LHEYNTQFQEKSR(11)<br>QVQLQESGGGLVQTGGS LR(1)- KLHEYNTQFQEKSR(12)       | 2.20E-11 | 4.31E-01 |
| 25 | Nb3-159(1)-p85α(504) | DSG                   | QVQLQESGGGLVQTGGS LR(1)-YSKEYIEK(2)                                                             | 4.40E-07 | 6.69E-01 |
| 26 | Nb3-159(1)-p85α(529) | BS <sup>3</sup> , DSG | QVQLQESGGGLVQTGGS LR(1)-IMHNYDKLK(7)                                                            | 1.08E-05 | 7.16E-01 |
| 27 | Nb3-159(1)-p85α(549) | DSG                   | QVQLQESGGGLVQTGGS LR(1)-LEEDLKK(6)                                                              | 1.34E-08 | 6.41E-01 |

|    |                            |                          |                                                                                                            |              |              |
|----|----------------------------|--------------------------|------------------------------------------------------------------------------------------------------------|--------------|--------------|
|    |                            |                          | QVQLQESGGGLVQTGGS<br>LR(1)-RLEEDLKK(7)                                                                     |              |              |
| 28 | Nb3-159(1)-<br>p85α(550)   | BS <sup>3</sup>          | QVQLQESGGGLVQTGGS<br>LR(1)-KQAAEYR(1)                                                                      | 3.63E-<br>12 | 2.43E-<br>03 |
| 29 | Nb3-159(1)-<br>p85α(566)   | DSG                      | QVQLQESGGGLVQTGGS<br>LR(1)-MNSIKPDLIQLR(5)                                                                 | 1.30E-<br>08 | 1.45E-<br>02 |
| 30 | Nb3-159(1)-<br>p85α(586)   | DSG                      | QVQLQESGGGLVQTGGS<br>LR(1)-<br>DQYLMWLTQKGVR(10)<br>QVQLQESGGGLVQTGGS<br>LR(1)-<br>TRDQYLMWLTQKGVR(12<br>) | 2.34E-<br>23 | 2.71E-<br>01 |
| 31 | Nb3-159(1)-<br>p85α(632)   | BS <sup>3</sup> ,<br>DSG | QVQLQESGGGLVQTGGS<br>LR(1)-NKAENLLR(2)                                                                     | 2.11E-<br>09 | 2.52E-<br>01 |
| 32 | Nb3-159(1)-<br>p85α(674)   | BS <sup>3</sup> ,<br>DSG | QVQLQESGGGLVQTGGS<br>LR(1)-<br>HCVINKTATGYGFAEPYN<br>LYSSLK(7)                                             | 3.45E-<br>13 | 5.09E-<br>03 |
| 33 | Nb3-159(43)-<br>p110α(353) | BS <sup>3</sup> ,<br>DSG | QAPGKER(5)-<br>DIDKIYVR(4)                                                                                 | 3.86E-<br>06 | 8.14E-<br>01 |
| 34 | Nb3-159(43)-<br>p85α(550)  | DSG                      | QAPGKER(5)-<br>KQAAEYR(1)                                                                                  | 6.99E-<br>08 | 2.45E-<br>01 |
| 35 | Nb3-159(43)-<br>p85α(632)  | BS <sup>3</sup> ,<br>DSG | QAPGKER(5)-<br>NKAENLLR(2)                                                                                 | 7.75E-<br>06 | 8.07E-<br>01 |
| 36 | Nb3-159(63)-<br>P110α(51)  | BS <sup>3</sup> ,<br>DSG | GSNTSYADSVKGR(9)-<br>HELKFEAR(5)                                                                           | 4.58E-<br>06 | 4.21E-<br>01 |
| 37 | Nb3-159(63)-<br>p110α(353) | DSG                      | GSNTSYADSVKGR(9)-<br>DIDKIYVR(4)                                                                           | 3.11E-<br>07 | 3.52E-<br>01 |
| 38 | Nb3-159(63)-<br>p85α(80)   | BS <sup>3</sup> ,<br>DSG | GSNTSYADSVKGR(9)-<br>KISPPTPK(1)<br>GSNTSYADSVKGR(9)-<br>KKISPPTPK(2)                                      | 3.42E-<br>08 | 8.15E-<br>01 |
| 39 | Nb3-159(63)-<br>p85α(422)  | DSG                      | GSNTSYADSVKGR(9)-<br>LDVKLLYPVSK(4)                                                                        | 5.15E-<br>10 | 4.07E-<br>01 |
| 40 | Nb3-159(63)-<br>p85α(437)  | DSG                      | GSNTSYADSVKGR(9)-<br>YQQDQVVKEDNIEAVGKK<br>(8)                                                             | 7.40E-<br>05 | 4.92E-<br>01 |
| 41 | Nb3-159(63)-<br>p85α(458)  | DSG                      | GSNTSYADSVKGR(9)-<br>LHEYNTQFQEKS(11)                                                                      | 3.18E-<br>05 | 6.74E-<br>01 |
| 42 | Nb3-159(63)-<br>p85α(549)  | DSG                      | GSNTSYADSVKGR(9)-<br>LEEDLKK(6)                                                                            | 7.39E-<br>14 | 2.71E-<br>01 |
| 43 | Nb3-159(63)-<br>p85α(586)  | DSG                      | GSNTSYADSVKGR(9)-<br>DQYLMWLTQKGVR(10)                                                                     | 5.61E-<br>11 | 1.08E-<br>01 |

|           |                            |                          |                                                                         |              |              |
|-----------|----------------------------|--------------------------|-------------------------------------------------------------------------|--------------|--------------|
| <b>44</b> | Nb3-159(63)-<br>p85α(673)  | DSG                      | GSNTSYADSVKGR(9)-<br>HCVINKTATGYGFAEPYN<br>LYSSLK(6)                    | 7.16E-<br>07 | 1.68E-<br>01 |
| <b>45</b> | Nb3-159(65)-<br>p85α(80)   | BS <sup>3</sup> ,<br>DSG | GSNTSYADSVKGR(11)-<br>KISPPTPK(1)<br>GSNTSYADSVKGR(11)-<br>KKISPPTPK(2) | 2.27E-<br>12 | 8.02E-<br>01 |
| <b>46</b> | Nb3-159(65)-<br>p110α(353) | BS <sup>3</sup> ,<br>DSG | GSNTSYADSVKGR(11)-<br>DIDKIYVR(4)                                       | 3.56E-<br>14 | 5.92E-<br>01 |
| <b>47</b> | Nb3-159(65)-<br>p85α(422)  | DSG                      | GSNTSYADSVKGR(11)-<br>LDVKLLYPVSK(4)                                    | 4.58E-<br>08 | 1.71E-<br>03 |
| <b>48</b> | Nb3-159(65)-<br>p85α(446)  | DSG                      | GSNTSYADSVKGR(11)-<br>EDNIEAVGKK(9)                                     | 6.72E-<br>06 | 6.42E-<br>01 |
| <b>49</b> | Nb3-159(65)-<br>p85α(549)  | DSG                      | GSNTSYADSVKGR(11)-<br>LEEDLKK(6)<br>GSNTSYADSVKGR(11)-<br>RLEEDLKK(7)   | 4.12E-<br>13 | 6.88E-<br>01 |
| <b>50</b> | Nb3-159(65)-<br>p85α(550)  | BS <sup>3</sup> ,<br>DSG | GSNTSYADSVKGR(11)-<br>KQAAEYR(1)                                        | 5.41E-<br>14 | 1.98E-<br>01 |
| <b>51</b> | Nb3-159(65)-<br>p85α(586)  | DSG                      | GSNTSYADSVKGR(11)-<br>DQYLMWLTQKGVR(10)                                 | 4.97E-<br>07 | 5.79E-<br>01 |
| <b>52</b> | Nb3-159(65)-<br>p85α(632)  | BS <sup>3</sup> ,<br>DSG | GSNTSYADSVKGR(11)-<br>NKAENLLR(2)                                       | 1.24E-<br>17 | 7.87E-<br>01 |
| <b>53</b> | Nb3-159(65)-<br>p85α(650)  | DSG                      | GSNTSYADSVKGR(11)-<br>ESSKQGCYACSVVVDGE<br>VK(2)                        | 5.38E-<br>09 | 7.37E-<br>01 |
| <b>54</b> | Nb3-159(76)-<br>p85α(632)  | BS <sup>3</sup> ,<br>DSG | DNTKNTVALQMNSLKPED<br>TAVYYCAADFGR(4)-<br>NKAENLLR(2)                   | 3.22E-<br>05 | 7.85E-<br>01 |
| <b>55</b> | Nb3-159(85)-<br>p85α(632)  | DSG                      | NTVALQMNSLKPEDTAVY<br>YCAADFGR(9)-<br>NKAENLLR(2)                       | 8.40E-<br>07 | 5.48E-<br>01 |
| <b>56</b> | Nb3-159(87)-<br>p85α(632)  | BS <sup>3</sup>          | NTVALQMNSLKPEDTAVY<br>YCAADFGR(11)-<br>NKAENLLR(2)                      | 1.48E-<br>06 | 1.19E-<br>04 |

<sup>a</sup>E-value means normalized refined\_scores for filtered peptide spectrum matches (PSMs) by FDR, the smaller the more confident. Best E-value is the smallest E-value of all spectra of the cross-linked peptide. <sup>b</sup>Score, which is short for SVM score in pLink 2, is the prime measure for FDR estimation. Best score is the smallest value of all spectra of the cross-linked peptide.

**Table S4.** Cryo-EM data acquisition and image processing.

| <b>Data collection</b>                                       |                          |                      |                      |                                     |
|--------------------------------------------------------------|--------------------------|----------------------|----------------------|-------------------------------------|
| Microscope                                                   | Titan Krios              |                      |                      |                                     |
| Voltage (kV)                                                 | 300                      |                      |                      |                                     |
| Corrected magnification                                      | 46,685                   |                      |                      |                                     |
| Pixel size (Å)                                               | 1.071                    |                      |                      |                                     |
| Detector                                                     | Gatan K3 Summit          |                      |                      |                                     |
| Defocus range (μm)                                           | -1.5 to -2.5             |                      |                      |                                     |
| Defocus mean (μm)                                            | -2.0                     |                      |                      |                                     |
| Total electron exposure (e-Å <sup>-2</sup> s <sup>-1</sup> ) | 70                       |                      |                      |                                     |
| Exposure rate (e-Å <sup>-2</sup> frame <sup>-1</sup> )       | 25                       |                      |                      |                                     |
| <b>Data processing</b>                                       | <b>PI3Kα-Nb3-126</b>     | <b>PI3Kα-Nb3-142</b> | <b>PI3Kα-Nb3-159</b> | <b>PI3Kα-Nb3-142 (cross-linked)</b> |
| Useable image movies                                         | 4,397                    | 5,211                | 3,012                | 3,388                               |
| Particles                                                    | 4,952,325                | 7,049,901            | 2,882,334            | 1,615,129                           |
| Final particles                                              | 506,412                  | 739,753              | 240,599              | 217,230                             |
| Map sharpening B factor (Å <sup>2</sup> )                    | -81.3                    | -163.2               | -144.3               | -130.3                              |
| Resolution (Å)                                               | 2.41                     | 3.08                 | 3.13                 | 3.38                                |
| Unmasked (0.143 FSC)                                         | 2.4                      | 3.2                  | 2.8                  | 3.6                                 |
| Masked (0.143 FSC)                                           | 2.4                      | 3.1                  | 2.8                  | 3.4                                 |
| Local resolution range (Å)                                   | 2.1-9.5                  | 2.0-10.2             | 2.0-10.7             | 2.0-11.4                            |
| <b>Model</b>                                                 | <b>PI3Kα-Nb3-126</b>     | <b>PI3Kα-Nb3-142</b> | <b>PI3Kα-Nb3-159</b> | <b>PI3Kα-Nb3-142 (cross-linked)</b> |
| EMDB accession code                                          | EMD-27327                | EMD-27334            | EMD-27330            | EMD-27336                           |
| PDB accession code                                           | 8DCP                     | 8DD4                 | 8DCX                 | 8DD8                                |
| <b>Model composition</b>                                     |                          |                      |                      |                                     |
| Chain                                                        | 3                        | 3                    | 3                    | 3                                   |
| Non-hydrogen atom                                            | 10,620                   | 10,425               | 9,646                | 10,727                              |
| Protein residue                                              | 1,284                    | 1,255                | 1,169                | 1,300                               |
| <b>Refinement</b>                                            |                          |                      |                      |                                     |
| Software                                                     | phenix.real_space_refine |                      |                      |                                     |
| Resolution (Å)                                               | 2.3                      | 3.1                  | 3.1                  | 3.5                                 |
| CC (mask)                                                    | 0.82                     | 0.74                 | 0.66                 | 0.76                                |

|                                         |           |           |           |           |
|-----------------------------------------|-----------|-----------|-----------|-----------|
| CC (peak)                               | 0.70      | 0.70      | 0.51      | 0.74      |
| CC (volume)                             | 0.79      | 0.74      | 0.62      | 0.75      |
| <b>Average B factor (Å<sup>2</sup>)</b> |           |           |           |           |
| Protein                                 | 46.44     | 52.81     | 51.24     | 63.46     |
| Ligand                                  | 19.91     | 33.94     | ---       | ---       |
| <b>R.M.S. deviation</b>                 |           |           |           |           |
| Bond length (Å) (# > 4σ)                | 0.003 (0) | 0.003 (0) | 0.002 (0) | 0.003 (0) |
| Bond angle (°) (# > 4σ)                 | 0.641 (0) | 0.679 (1) | 0.559 (1) | 0.619 (1) |
| <b>Validation</b>                       |           |           |           |           |
| Molprobrity score                       | 2.26      | 1.68      | 1.75      | 1.94      |
| Clashscore, all atoms                   | 9.43      | 10.00     | 9.76      | 11.24     |
| Rotamer outlier (%)                     | 3.64      | 0.00      | 0.00      | 0.00      |
| Cβ outlier (%)                          | 0.00      | 0.00      | 0.00      | 0.00      |
| CaBLAM outlier (%)                      | 2.70      | 1.63      | 2.24      | 3.33      |
| <b>Ramachandran plot (%)</b>            |           |           |           |           |
| Outlier                                 | 0.00      | 0.16      | 0.09      | 0.31      |
| Allowed                                 | 4.80      | 2.74      | 3.50      | 5.21      |
| Favored                                 | 95.2      | 97.10     | 96.41     | 94.84     |

**Dataset S1.** CXMS derived restraints and docking analysis for nanobody PI3K $\alpha$  complexes.
